# Supplementary material for: Anion recognition and redox sensing amplification by self-assembled monolayers of 1,1′-bis(alkyl-N-amido)ferrocene
Source: Royal Society of Chemistry journal article supplement (doi:10.1039/b205340n), 2002-01-01
Supplement: b205340n.doc [file b205340n.doc]

Supplementary Material (ESI) for Chemical Communications

This journal is © The Royal Society of Chemistry 2002

Diffusive electrochemical experiments were carried out in a three-electrode cell designed in-house. This comprised of a working compartment, Pt gauze counter electrode and a luggin capillary connected to the reference compartment. Calomel and mercury sulphate reference electrodes were used in aqueous solution. A, regularly calibrated, silver/silver nitrate reference was used in organic solvent (5-7 mV vs SCE). All solutions were carefully degassed with pure argon prior to scanning. Working electrodes were 2-3 mm diameter circular discs, 1 mM diameter gold wires or a 3 mm diameter gold rod. The latter were annealed in a pure butane flame prior to electropolishing.

Home-made and commercial polycrystalline gold electrodes were cleaned exhaustively by mechanical polishing on alumina and electropolishing in 1 M ultra-pure H2SO4. These were rinsed in pure (Elga) water and AnalR alcohol them immersed in argon-degassed mM solutions (dry dichloromethane) of the sensor, overnight at 5 0C and in the dark.

Calculated coverages of 5-8 x 1014 molecules/cm2 (3-4.5 x 10-10 moles/cm2) being broadly consistent with a good molecular adlayer. Capacitive analyses (50-75 μF/cm-2) indicated that molecular packing was not as tight as typically observed in simple alkyl thiols and/or the monolayers were not defect free. Monolayers of the thiol derivative (4) were typically of greater quality than those of (3).

SAMs of (3) and (4) had identical half wave potentials (-20 mV vs Ag/AgNO3) in solvent (7:3 v/v CH2Cl2:CH3CN). Aqueous scans were carried out at 296 K in the presence of 100 mM NaClO4 supporting electrolyte. Under such conditions the half wave potentials of these SAMs were -200 mV vs Hg/HgSO4.
